# Supplementary material for: Recommendations for a Core Outcome Set for Measuring Standing Balance in Adult Populations: A Consensus-Based Approach
Source: PubMed Central journal article supplement (PMC4358983; doi:10.1371/journal.pone.0120568), 2015-03-13
Supplement: pone.0120568.s002.pdf [file pone.0120568.s002.pdf]

## Round 2 Voting Results

| Rate, on a scale of 1 (lowest) to 5 (highest), the overall suitability of each measure for inclusion in a balance Core Outcome Set for adult populations. | Score (N) |   |   |   |   | Rating Average | Number of ratings >=4 | Decision (forward to round 3 if >=7 votes >=4) |
|-----------------------------------------------------------------------------------------------------------------------------------------------------------|-----------|---|---|---|---|----------------|-----------------------|------------------------------------------------|
|                                                                                                                                                           | 1         | 2 | 3 | 4 | 5 |                |                       |                                                |
| ID #4: Balance Error Scoring System (BESS)                                                                                                                | 11        | 3 | 0 | 0 | 0 | 1.21           | 0                     | Exclude                                        |
| ID #6: Balance Evaluation Systems Test (BESTest)                                                                                                          | 0         | 3 | 7 | 4 | 0 | 3.07           | 4                     | Exclude                                        |
| ID #7: Brief Balance Evaluation Systems Test (Brief BESTest)                                                                                              | 1         | 6 | 3 | 4 | 0 | 2.71           | 4                     | Exclude                                        |
| ID #8: Mini Balance Evaluation Systems Test (Mini BESTest)                                                                                                | 0         | 2 | 2 | 6 | 4 | 3.86           | 10                    | Retain                                         |
| ID #12: Short Form of the Berg Balance Scale (SFBBBS)                                                                                                     | 4         | 2 | 5 | 3 | 0 | 2.50           | 3                     | Exclude                                        |
| ID #17: Community Balance and Mobility Scale (CB&M)                                                                                                       | 7         | 5 | 1 | 1 | 0 | 1.71           | 1                     | Exclude                                        |
| ID #19: Dynamic Gait Index (DGI)                                                                                                                          | 0         | 5 | 6 | 2 | 1 | 2.93           | 3                     | Exclude                                        |
| ID #21: Functional Gait Assessment (FGA)                                                                                                                  | 1         | 8 | 3 | 2 | 0 | 2.43           | 2                     | Exclude                                        |
| ID #22: Five Times Sit-to-Stand Test (5STS)                                                                                                               | 4         | 6 | 0 | 4 | 0 | 2.29           | 4                     | Exclude                                        |
| ID #23: Four Square Step Test (FSST)                                                                                                                      | 2         | 3 | 6 | 2 | 1 | 2.79           | 3                     | Exclude                                        |
| ID #24: Fullerton Advanced Balance (FAB) Scale                                                                                                            | 0         | 2 | 7 | 5 | 0 | 3.21           | 5                     | Exclude                                        |
| ID #25: Functional Reach Test (FRT)                                                                                                                       | 5         | 8 | 0 | 1 | 0 | 1.79           | 1                     | Exclude                                        |
| ID #26: Multidirectional Reach Test                                                                                                                       | 4         | 7 | 3 | 0 | 0 | 1.93           | 0                     | Exclude                                        |
| ID #31: Performance Oriented Mobility Assessment (POMA)                                                                                                   | 0         | 5 | 4 | 4 | 1 | 3.07           | 5                     | Exclude                                        |
| ID #40: Short Physical Performance Battery (SPPB)                                                                                                         | 0         | 1 | 4 | 8 | 1 | 3.64           | 9                     | Retain                                         |
| ID #50: Expanded Timed Up-and-Go Test                                                                                                                     | 9         | 5 | 0 | 0 | 0 | 1.36           | 0                     | Exclude                                        |
| ID #52: Unified Balance Scale (UBS)                                                                                                                       | 0         | 3 | 4 | 7 | 0 | 3.29           | 7                     | Retain                                         |
| ID #55: High Level Mobility Assessment Tool (HiMAT)                                                                                                       | 11        | 2 | 1 | 0 | 0 | 1.29           | 0                     | Exclude                                        |
