# Supplementary material for: Recommendations for a Core Outcome Set for Measuring Standing Balance in Adult Populations: A Consensus-Based Approach
Source: PubMed Central journal article supplement (PMC4358983; doi:10.1371/journal.pone.0120568), 2015-03-13
Supplement: pone.0120568.s003.pdf [file pone.0120568.s003.pdf]

### Round Three Results

| This measure should be included in the balance COS for adult populations. | Yes | No | Decision (include if $\geq 9$ votes =yes) |
|---------------------------------------------------------------------------|-----|----|-------------------------------------------|
| ID #11: Berg Balance Scale (BBS)                                          | 11  | 1  | Include                                   |
| ID #49: Timed Up-and-Go (TUG)                                             | 3   | 9  | Exclude                                   |
| ID #8: Mini Balance Evaluation Systems Test (Mini BESTest)                | 11  | 1  | Include                                   |
| ID #40: Short Physical Performance Battery (SPPB)                         | 6   | 6  | Exclude                                   |
| ID #52: Unified Balance Scale (UBS)                                       | 0   | 12 | Exclude                                   |
